# Supplementary material for: Formation of the Inclusive Environments and Metrics in Biology Education and Research (iEMBER) Network: Building a Culture of Diversity, Equity, and Inclusion
Source: Atypon-hosted journal article supplement (doi:10.1187/cbe.18-03-0042), 2019-02-08
Supplement: combinedsupmats.pdf [file combinedsupmats.pdf]

# Supplemental Material

*CBE—Life Sciences Education*

Tennial *et al.*

# iEMBER Participants Were Unified By

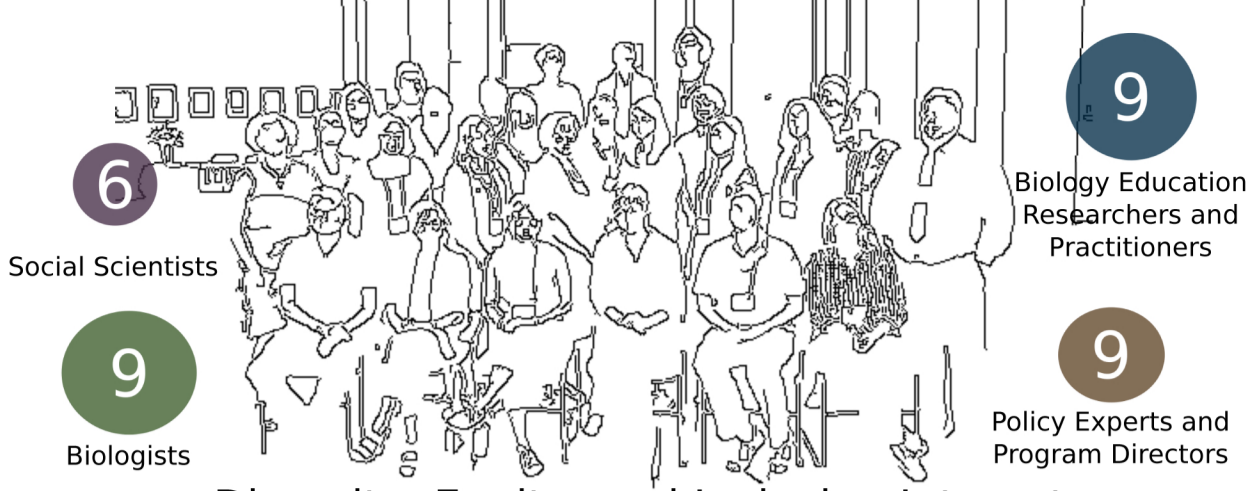

## Diversity, Equity, and Inclusion Interests

| iEMBER Participant    | Institute                                     | Specialty         | Census Bureau Region | Carnegie Classification |
|-----------------------|-----------------------------------------------|-------------------|----------------------|-------------------------|
| Alberto Roca          | DiverseScholar                                | Program Director  | West                 | NA                      |
| Alexandra Erwin       | The University of Kansas                      | Biologist         | Midwest              | Large                   |
| Alison Crowe          | University of Washington                      | Biology Education | West                 | Large                   |
| Cassandra VanDunk     | Northwestern University                       | Biologist         | Midwest              | Large                   |
| Cynthia Curry         | CAST, Universal Design for Learning           | Policy            | Northeast            | NA                      |
| Davinelle Daniels     | Washington University in St. Louis            | Biologist         | Midwest              | Large                   |
| Erica Cline           | University of Washington Tacoma               | Biologist         | West                 | Medium                  |
| Erin Solomon          | Washington University in Saint Louis          | Social Science    | Midwest              | Large                   |
| Falak Saffaf          | Saint Louis University                        | Social Science    | Midwest              | Large                   |
| Gary McDowell         | The Future of Research, Inc.                  | Policy            | Northeast            | NA                      |
| Gina Frey             | Washington University in Saint Louis          | Program Director  | Midwest              | Large                   |
| Graciela Unguez       | ASCB-MAC/New Mexico State University          | Biologist         | West                 | Large                   |
| Heather Heinz         | University of Washington Tacoma               | Biology Education | West                 | Medium                  |
| Jana Marcette         | Harris-Stowe State University                 | Biology Education | Midwest              | Small                   |
| Jayanthi Sriram       | Washington University in Saint Louis          | Biology Education | Midwest              | Large                   |
| Jessica Lucas         | Southern Illinois University, Carbondale      | Program Director  | Midwest              | Large                   |
| Joanna Showell        | Bethune-Cookman University                    | Policy            | South                | Medium                  |
| Joseph Bradley        | Washington University in St. Louis            | Biologist         | Midwest              | Large                   |
| Kaila Colyott         | University of Kansas                          | Biologist         | Midwest              | Large                   |
| Katelyn Cooper        | Arizona State University                      | Biology Education | West                 | Large                   |
| Katie Shannon         | Missouri University of Science and Technology | Biology Education | Midwest              | Medium                  |
| Kristin Broussard     | Saint Louis University                        | Social Science    | Midwest              | Large                   |
| Latanya Hammonds-Odie | Georgia Gwinnett College                      | Biologist         | South                | Medium                  |
| Liz Martinez          | Illinois Mathematics and Science Academy      | Policy            | West                 | NA                      |
| Mark McDaniel         | Washington University in Saint Louis          | Social Science    | Midwest              | Large                   |
| Michael Kennedy       | Northwestern University                       | Program Director  | Midwest              | Large                   |
| Michael Moore         | Oklahoma State                                | Biology Education | South                | Large                   |
| Rachel Tennial        | University of Arkansas at Little Rock         | Social Science    | South                | Medium                  |
| Richard Harvey        | Saint Louis University                        | Social Science    | Midwest              | Large                   |
| Sara Brownell         | Arizona State University                      | Biology Education | West                 | Large                   |
| Sarah Smaga           | Yale University                               | Biologist         | West                 | Large                   |
| Scott Horrell         | Harris-Stowe State University                 | Biology Education | Midwest              | Small                   |
| Uwe Hilgert           | The University of Arizona                     | Program Director  | West                 | Large                   |

Figure S1. 2017 iEMBER Conference Participants

|                                                                                                                                                                                       |
|---------------------------------------------------------------------------------------------------------------------------------------------------------------------------------------|
| <a href="http://www.apa.org/">APA - American Psychological Association (http://www.apa.org/)</a>                                                                                      |
| <a href="https://www.asbmb.org/">ASBMB - American Society for Biochemistry and Molecular Biology (https://www.asbmb.org/)</a>                                                         |
| <a href="http://www.ascb.org/">ASCB - American Society for Cell Biology (http://www.ascb.org/)</a>                                                                                    |
| <a href="https://www.asm.org/">ASM - American Society for Microbiology (https://www.asm.org/)</a>                                                                                     |
| <a href="https://aspb.org/">ASPB - American Society of Plant Biologists (https://aspb.org/)</a>                                                                                       |
| <a href="http://www.biophysics.org/">BPS - Biophysical Society (http://www.biophysics.org/)</a>                                                                                       |
| <a href="https://www.cur.org/">CUR - Council on Undergraduate Research (https://www.cur.org/)</a>                                                                                     |
| <a href="https://www.esa.org/esa/">ESA - Ecological Society of America (https://www.esa.org/esa/)</a>                                                                                 |
| <a href="http://www.genetics-gsa.org/">GSA - Genetics Society of America (http://www.genetics-gsa.org/)</a>                                                                           |
| <a href="https://www.icahdq.org/">ICA - International Communication Association (https://www.icahdq.org/)</a>                                                                         |
| <a href="https://nabt.org/">NABT - National Association of Biology Teachers (https://nabt.org/)</a>                                                                                   |
| <a href="https://www.natcom.org/">NCA - National Communication Association (https://www.natcom.org/)</a>                                                                              |
| <a href="http://www.nacada.ksu.edu/">NACADA - National Academic Advising Association (http://www.nacada.ksu.edu/)</a>                                                                 |
| <a href="http://www.nsta.org/">NSTA - National Science Teachers Association (http://www.nsta.org/)</a>                                                                                |
| <a href="https://saber-biologyeducationresearch.wikispaces.com/">SABER - Society for American Biology Education Research (https://saber-biologyeducationresearch.wikispaces.com/)</a> |
| <a href="http://www.sdbonline.org/">SDB - Society for Developmental Biology (http://www.sdbonline.org/)</a>                                                                           |
| <a href="http://www.sfn.org/">SFN - Society for Neuroscience (http://www.sfn.org/)</a>                                                                                                |
| <a href="http://www.spsp.org/">SPSP - Society for Personality and Social Psychology (http://www.spsp.org/)</a>                                                                        |
| <a href="https://ssarherps.org/">SSAR - Society for the Study of Amphibians and Reptiles (https://ssarherps.org/)</a>                                                                 |
| <a href="http://www.evolutionsociety.org/">SSE - Society for the Study of Evolution (http://www.evolutionsociety.org/)</a>                                                            |

Figure S2. Professional Societies Discussed at 2017 iEMBER Conference\*

\*Disclaimer: This list is not meant to represent an exhaustive listing of professional societies, nor does the information necessarily reflect the current status of the professional society websites with relation to inclusion and diversity information and statements. Participants in the iEMBER 2017 meeting collected information on Inclusion and Diversity from professional society websites prior to the June 2017 meeting.

## TAKE ACTION TO BROADEN PARTICIPATION IN PROFESSIONAL SOCIETIES

How do you build membership support for a diverse and inclusive professional society?

### WHAT YOU CAN DO

- Ask if active committees and initiatives exist and **join**.
- **Lead local meetings**, emphasizing inclusion.
- **Promote the career progression** of underrepresented students by **sponsoring their inclusion** in meetings, emphasizing the importance of networking and professional development.

### ... AND GET YOUR SOCIETIES TO DO

- **Organize and host** (iEMBER) diversity and inclusion sessions at both national and regional meetings of professional societies.
- **Create awards** to recognize those engaged in promoting diversity and inclusivity and changing current systems.
- **Lobby at the federal level** for opportunities and structures that promote diversity and inclusion.
- **Encourage long-term membership** by creating a face of the organization that is inviting through programming and opportunities for involvement.
- **Center inclusion and diversity into the efforts of the entire organization**, not just as a sub-issue addressed by a sub-committee.

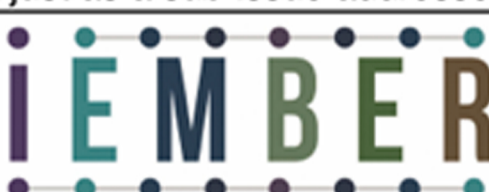

Figure S3: What Can You Do To Help Diversify Your Scientific Society?
